# Supplementary material for: IL-8 Triggers Neutrophil Extracellular Trap Formation Through an Nicotinamide Adenine Dinucleotide Phosphate Oxidase- and Mitogen-Activated Protein Kinase Pathway-Dependent Mechanism in Uveitis
Source: PubMed Central journal article supplement — Invest Ophthalmol Vis Sci. 2023 Oct 12;64(13):19. doi: 10.1167/iovs.64.13.19 (PMC10587853; doi:10.1167/iovs.64.13.19), 2023-10-12
Supplement: iovs-64-13-19_s001.pdf [file iovs-64-13-19_s001.pdf]

**Supplementary Table 1 Active intraocular inflammation information of ocular-active BD patients**

| No. | Sex | Age | Anterior chamber cells | Anterior chamber flare | Vitreous haze | Retinal vasculitis* | Retinal vascular leakages* by FFA** |
|-----|-----|-----|------------------------|------------------------|---------------|---------------------|-------------------------------------|
| B1  | M   | 15  | ++++                   | ++                     | ++            | -                   | +                                   |
| B2  | F   | 53  | +                      | ++                     | ++            | -                   | +                                   |
| B3  | F   | 44  | +                      | ++                     | ++            | +                   | +                                   |
| B4  | M   | 33  | ++++                   | ++                     | ++            | +                   | +                                   |
| B5  | M   | 55  | ++                     | +                      | +             | -                   | +                                   |
| B6  | M   | 32  | ++                     | +                      | ++            | +                   | +                                   |
| B7  | M   | 43  | ++                     | +                      | +             | +                   | +                                   |
| B8  | M   | 51  | +                      | ++                     | +             | -                   | +                                   |
| B9  | M   | 24  | ++                     | ++                     | ++            | -                   | +                                   |
| B10 | F   | 55  | ++                     | +                      | +             | -                   | +                                   |
| B11 | M   | 25  | +                      | +                      | +             | -                   | +                                   |
| B12 | F   | 32  | +++                    | ++                     | ++            | +                   | +                                   |
| B13 | F   | 31  | ++                     | ++                     | ++            | -                   | +                                   |
| B14 | M   | 44  | +                      | ++                     | ++            | -                   | +                                   |
| B15 | M   | 43  | +                      | +                      | ++            | +                   | +                                   |
| B16 | M   | 47  | +++                    | ++                     | +             | -                   | +                                   |
| B17 | F   | 30  | +                      | +                      | +             | -                   | +                                   |
| B18 | M   | 22  | +                      | +                      | +             | +                   | +                                   |

\*+: the presence of the change.

-: the absence of the change.

\*\*FFA: fundus fluorescein angiography.
