# Supplementary material for: IL-8 Triggers Neutrophil Extracellular Trap Formation Through an Nicotinamide Adenine Dinucleotide Phosphate Oxidase- and Mitogen-Activated Protein Kinase Pathway-Dependent Mechanism in Uveitis
Source: PubMed Central journal article supplement — Invest Ophthalmol Vis Sci. 2023 Oct 12;64(13):19. doi: 10.1167/iovs.64.13.19 (PMC10587853; doi:10.1167/iovs.64.13.19), 2023-10-12
Supplement: iovs-64-13-19_s002.pdf [file iovs-64-13-19_s002.pdf]

**Supplementary Table 2 Clinical information of ocular-active BD patients**

| No. | Sex | Age | Oral<br>ulcers | Genital<br>ulcers | Cutaneous<br>involvement | Intestinal<br>involvement | Nerous<br>involvement |
|-----|-----|-----|----------------|-------------------|--------------------------|---------------------------|-----------------------|
| B1  | M   | 15  | +              | -                 | -                        | -                         | -                     |
| B2  | F   | 53  | +              | -                 | -                        | -                         | -                     |
| B3  | F   | 44  | +              | +                 | +                        | -                         | -                     |
| B4  | M   | 33  | +              | +                 | -                        | -                         | -                     |
| B5  | M   | 55  | +              | +                 | -                        | -                         | -                     |
| B6  | M   | 32  | +              | -                 | +                        | -                         | -                     |
| B7  | M   | 43  | +              | +                 | +                        | -                         | -                     |
| B8  | M   | 51  | +              | +                 | +                        | -                         | -                     |
| B9  | M   | 24  | +              | +                 | +                        | +                         | -                     |
| B10 | F   | 55  | +              | -                 | -                        | -                         | -                     |
| B11 | M   | 25  | +              | +                 | -                        | -                         | -                     |
| B12 | F   | 32  | +              | -                 | -                        | -                         | -                     |
| B13 | F   | 31  | +              | -                 | -                        | -                         | -                     |
| B14 | M   | 44  | +              | -                 | -                        | -                         | -                     |
| B15 | M   | 43  | +              | +                 | +                        | -                         | -                     |
| B16 | M   | 47  | +              | -                 | -                        | -                         | -                     |
| B17 | F   | 30  | +              | -                 | -                        | -                         | -                     |
| B18 | M   | 22  | +              | -                 | +                        | -                         | -                     |
